# Supplementary material
Source: PubMed Central journal article supplement (PMC1149399)

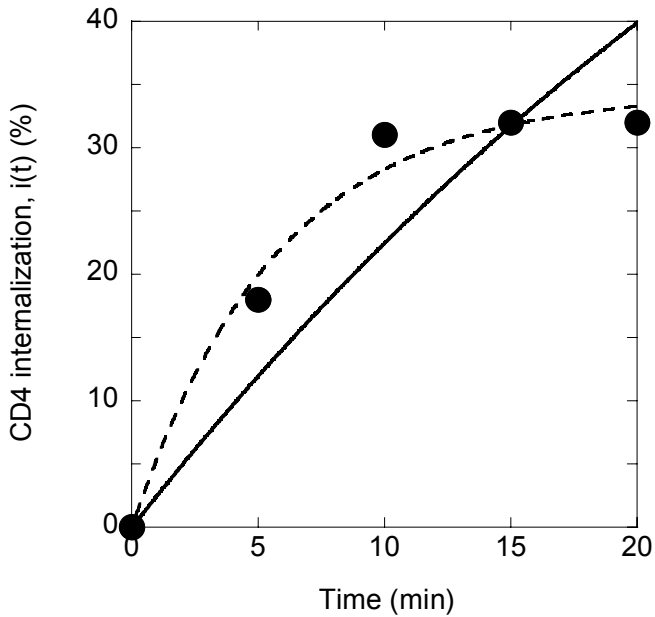

Supplement: pnas_0407498102_1.pdf [file pnas_0407498102_1.pdf]
